# Supplementary material for: Influence of an oxygen vacancy on the electronic structure of the asymmetric mixed borate–carbonate Pb7O(OH)3(CO3)3(BO3)
Source: Royal Society of Chemistry journal article supplement (doi:10.1039/c5ra24601f), 2016-01-01
Supplement: c5ra24601f1.pdf [file c5ra24601f1.pdf]

# **Influence of Oxygen Vacancy on the Electronic Structure of the Asymmetric Mixed Borate-Carbonate $\text{Pb}_7\text{O}(\text{OH})_3(\text{CO}_3)_3(\text{BO}_3)$**

A. H. Reshak<sup>1,2,\*</sup>, Sushil Auluck<sup>3,4</sup>

<sup>1</sup>*New Technologies - Research Centre, University of West Bohemia, Univerzitni 8, 306 14 Pilsen, Czech republic*

<sup>2</sup>*Center of Excellence Geopolymer and Green Technology, School of Material Engineering, University Malaysia Perlis, 01007 Kangar, Perlis, Malaysia*

<sup>3</sup>*Council of Scientific and Industrial Research - National Physical Laboratory Dr. K S Krishnan Marg, New Delhi 110012, India*

<sup>4</sup>*Department of Physics, Indian Institute of Technology Delhi, Hauz Khas, New Delhi 110016, India*

## **Supplementary materials**

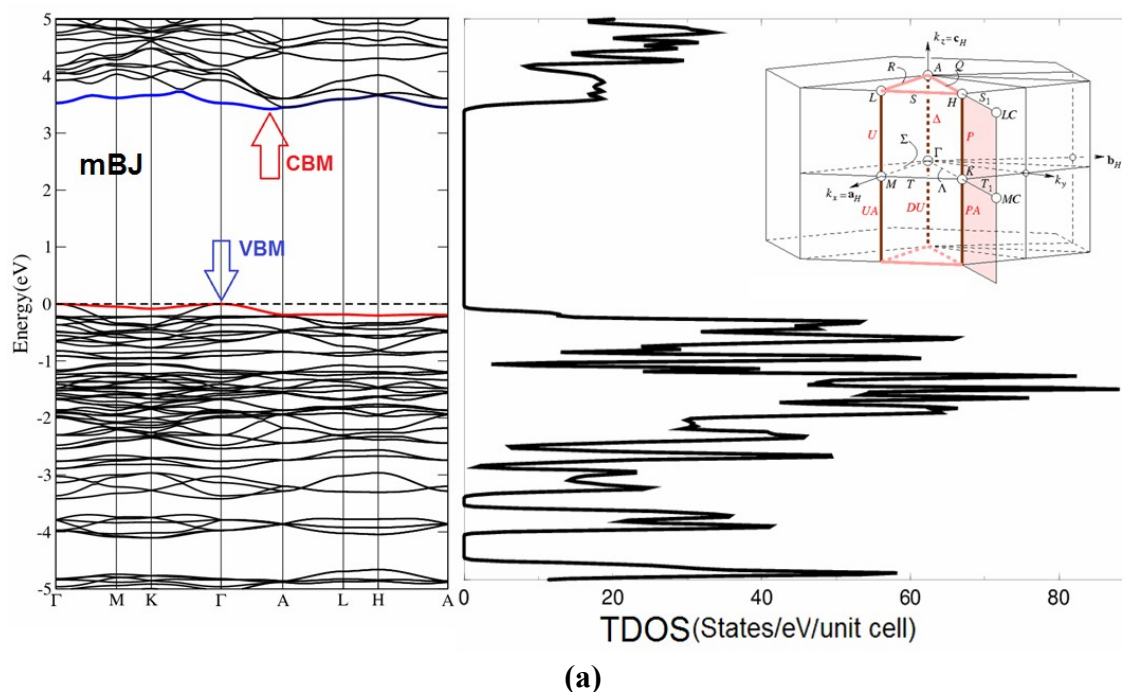

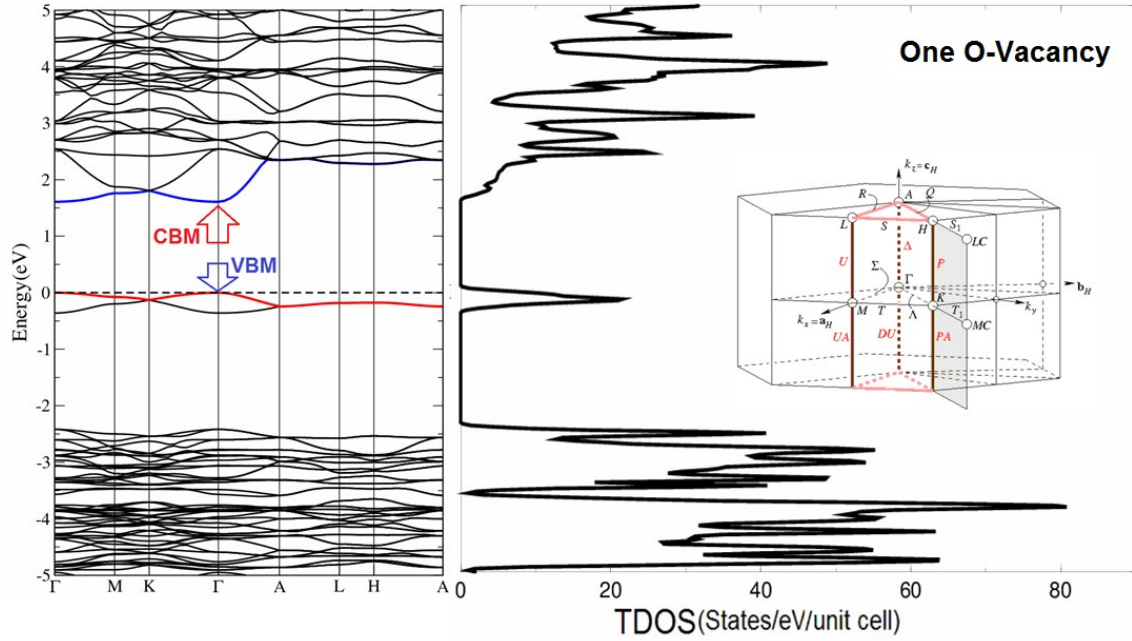

(b)  
**Fig. S1:** The total density of states (TDOS) along with the electronic band structure and the first BZ are shown for I and II. It is clear that the oxygen vacancy significantly influences the TDOS.
